# Supplementary material for: Targeting the reduction of inflammatory risk associated with cardiovascular disease by treating periodontitis either alone or in combination with a systemic anti-inflammatory agent: protocol for a pilot, parallel group, randomised controlled trial
Source: HighWire-hosted journal article supplement (doi:10.1136/bmjopen-2022-063148), 2022-11-01
Supplement: bmjopen-2022-063148supp002_data_supplement.pdf [file bmjopen-2022-063148supp002_data_supplement.pdf]

## WHO data registry

| Data Category                                 | Information                                                                                                                                                                                                                                                                                                                                                                                                                                                                                                                                                                                                       |
|-----------------------------------------------|-------------------------------------------------------------------------------------------------------------------------------------------------------------------------------------------------------------------------------------------------------------------------------------------------------------------------------------------------------------------------------------------------------------------------------------------------------------------------------------------------------------------------------------------------------------------------------------------------------------------|
| Primary registry and trial identifying number | Australia New Zealand Clinical Trials Registry<br>ACTRN12619001573145p                                                                                                                                                                                                                                                                                                                                                                                                                                                                                                                                            |
| Date of registration in primary registry      | 14/11/2019                                                                                                                                                                                                                                                                                                                                                                                                                                                                                                                                                                                                        |
| Secondary identifying numbers                 | U1111-1267-9602 (UTN)<br>2019/ETH00200                                                                                                                                                                                                                                                                                                                                                                                                                                                                                                                                                                            |
| Source(s) of monetary or material support     | The University of Sydney                                                                                                                                                                                                                                                                                                                                                                                                                                                                                                                                                                                          |
| Primary sponsor                               | The Western Sydney Local Health District                                                                                                                                                                                                                                                                                                                                                                                                                                                                                                                                                                          |
| Secondary sponsor(s)                          | N/A                                                                                                                                                                                                                                                                                                                                                                                                                                                                                                                                                                                                               |
| Contact for public queries                    | Dr Rahena Akhter                                                                                                                                                                                                                                                                                                                                                                                                                                                                                                                                                                                                  |
| Contact for scientific queries                | Prof Joerg Eberhard                                                                                                                                                                                                                                                                                                                                                                                                                                                                                                                                                                                               |
| Public title                                  | Treatment of gum disease to reduce cardiovascular risk                                                                                                                                                                                                                                                                                                                                                                                                                                                                                                                                                            |
| Scientific title                              | Targeting the systemic inflammation associated with periodontitis to reduce risk in patients with coronary artery disease and on statin therapy- a randomized feasibility study                                                                                                                                                                                                                                                                                                                                                                                                                                   |
| Countries of recruitment                      | Australia                                                                                                                                                                                                                                                                                                                                                                                                                                                                                                                                                                                                         |
| Health condition(s) or problem(s) studied     | Coronary artery disease<br>Periodontitis                                                                                                                                                                                                                                                                                                                                                                                                                                                                                                                                                                          |
| Intervention(s)                               | Participants will be allocated to one of 4 arms:<br>1) Periodontal treatment<br>2) Colchicine administration<br>3) Periodontal treatment + colchicine administration<br>4) No treatment<br>Periodontal treatment will involve scaling and root planing. This will be performed over 3 separate appointments, beginning at baseline with a 1-2 week interval between appointments. Treatment will be carried out by a registered oral health practitioner at the Westmead Centre for Oral Health.<br><br>Colchicine will be administered via 0.5mg tablets to be taken by the participants once daily for 8 weeks. |
| Key inclusion and exclusion criteria          | <b>Medical inclusion criteria:</b><br>Have coronary artery disease (acute coronary syndrome/ stable angina and are on statin therapy.<br>≥ 18 years.<br><b>Medical Exclusion criteria:</b><br>currently taking or have had antibiotic therapy in the last 3 months.<br>currently pregnant, lactating or planning pregnancy.<br>severe renal impairment: GFR <30.<br>severe hepatic impairment: History of CKD and or alanine aminotransferase >3 upper limit of normal [ULN]).<br>Blood dyscrasias.<br>Taking medications that interact with Colchicine.<br><b>Dental inclusion criteria:</b>                     |

|                         |                                                                                                                                                                                                                                                             |
|-------------------------|-------------------------------------------------------------------------------------------------------------------------------------------------------------------------------------------------------------------------------------------------------------|
|                         | No subgingival scaling and root planning in the last 6 months.<br>≥ 15 teeth.<br>Mod-severe periodontitis.<br><b>Dental Exclusion criteria:</b><br>Received subgingival scaling and root planning in the last 6 months.<br>< 15 teeth<br>Mild periodontitis |
| Study type              | Interventional                                                                                                                                                                                                                                              |
| Date of first enrolment | 23/06/2022                                                                                                                                                                                                                                                  |
| Target sample size      | 60                                                                                                                                                                                                                                                          |
| Recruitment status      | Recruiting                                                                                                                                                                                                                                                  |
| Primary outcome(s)      | 1) Difference in hsCRP                                                                                                                                                                                                                                      |
| Key secondary outcomes  | 1) Difference in lipids and periodontal parameters<br>2) Feasibility measures (recruitment conversion rate, completion rate, safety and tolerability, trial evaluation)                                                                                     |
